# Supplementary material
Source: Springer Nature journal article supplement (https://www.springermedizin.de/resource/supplementary/13014_2013_1015_MOESM3_ESM.pdf/9635020)

**Thickness ratio at level A**

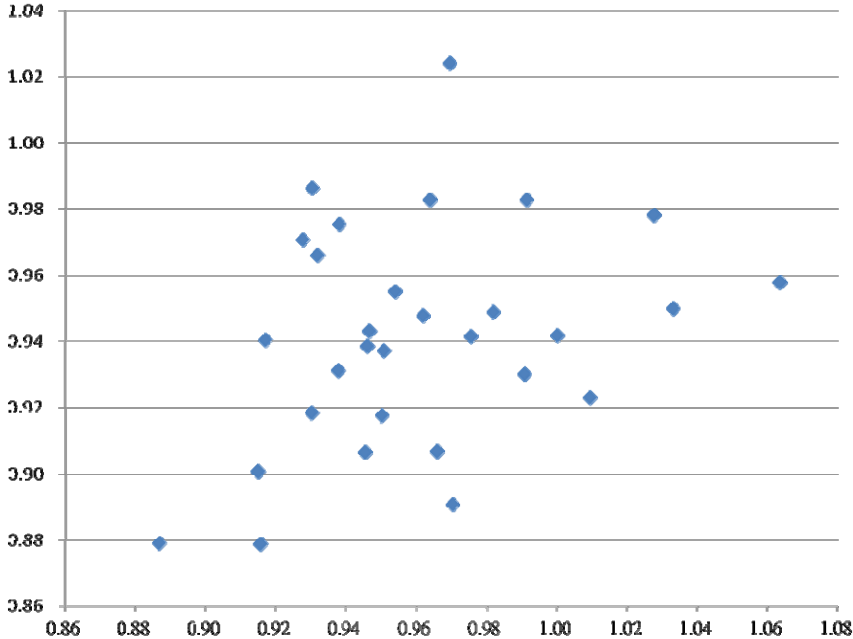

**Body weight ratio at the 20th fraction**

Supplement: MOESM3 [file 9635020]
